# Supplementary material for: Peptide presentation by bat MHC class I provides new insight into the antiviral immunity of bats
Source: PLoS Biol. 2019 Sep 9;17(9):e3000436. doi: 10.1371/journal.pbio.3000436 (PMC6752855; doi:10.1371/journal.pbio.3000436)
Supplement: S1 Data — (XLSX) [file pbio.3000436.s013.xlsx]

## Sheet: Figure 1A
	Bat	Opossum	Koala	Tammar wallaby	Tasmanian devil	Human	NHP	Mouse	Equids
No insert	7/56	4/23	0	0	0	10226/10226	2160/2160	250/250	8/8
3AA insert	17/56	19/23	14/28	14/14	6/6	0	0	0	0
5AA insert	32/56	0	0	0	0	0	0	0	0
others	0	0	14/28	0	0	0	0	0	0
	Bat	Opossum	Koala	Tammar wallaby	Tasmanian devil	Human	NHP	Mouse	Equids
No insert	0.125	0.173913	0	0	0	1	1	1	1
3AA insert	0.303571	0.826087	0.5	1	1	0	0	0	0
5AA insert	0.571429	0	0	0	0	0	0	0	0
others	0	0	0.5	0	0	0	0	0	0

## Sheet: Figure 1C
	Bat	Opossum	Koala	Tammar wallaby	Tasmanian devil	Human	NHP	Mouse	Equids
59D/E	40/56	13/23	21/28	14/14	6/6	18/10226	0	24/250	0
59D+65R	20/56	7/23	11/28	9/14	4/6	0	0	21/250	0
+/-	22/56	7/23	11/28	13/14	4/6	11/10226	7/2161	25/250	1/8
	Bat	Opossum	Koala	Tammar wallaby	Tasmanian devil	Human	NHP	Mouse	Equids
59D/E	0.714286	0.565217	0.75	1	1	0.00176022	0	0.096	0
59D+65R	0.357143	0.304348	0.392857	0.642857	0.666667	0	0	0.084	0
+/-	0.392857	0.304348	0.392857	0.928571	0.666667	0.00107569	0.00322061	0.1	0.125

## Sheet: Figure 1D
	No-3AA insert gene				3AA-insert gene
59D/E	0.589744	23/39		59D/E	1	17/17
59D+65R	0.230769	9/39		59D+65R	0.647059	11/17
+/-	0.282051	11/39		+/-	0.705882	12/17

## Sheet: Figure 4H
Hev-1		D1A		F2A		T5A		P8A
19.9695	0	20.0944	0	20.2444	0	20.3943	0	19.9695	0
20.5558	0.00504	20.5565	0.00555	20.7442	0.17472	20.9724	0.02333	20.5137	0.03156
21.1422	0.01135	21.0186	0.0127	21.244	0.40247	21.5506	0.04973	21.058	0.07733
21.7286	0.01765	21.4808	0.02222	21.7438	0.7051	22.1287	0.07858	21.6022	0.14362
22.3149	0.02521	21.9429	0.03253	22.2437	1.09822	22.7069	0.11173	22.1465	0.23516
22.9013	0.03404	22.405	0.04602	22.7435	1.61612	23.285	0.14796	22.6907	0.36773
23.4876	0.04538	22.8671	0.06269	23.2433	2.28691	23.8632	0.18847	23.2349	0.55396
24.074	0.05799	23.3292	0.08411	23.7431	3.16361	24.4413	0.2339	23.7792	0.8191
24.6603	0.07312	23.7913	0.10951	24.243	4.29302	25.0195	0.28425	24.3234	1.19472
25.2467	0.09077	24.2535	0.14125	24.7428	5.74691	25.5976	0.34073	24.8676	1.72343
25.833	0.11094	24.7156	0.18093	25.2426	7.60015	26.1758	0.40396	25.4119	2.46836
26.4194	0.13615	25.1777	0.22933	25.7424	9.9401	26.7539	0.47395	25.9561	3.50683
27.0057	0.16388	25.6398	0.28964	26.2422	12.851	27.332	0.55192	26.5003	4.95092
27.5921	0.19666	26.1019	0.36423	26.742	16.4171	27.9102	0.63909	27.0446	6.9316
28.1785	0.23574	26.564	0.45628	27.2418	20.7007	28.4883	0.73671	27.5888	9.6146
28.7648	0.28239	27.0262	0.56976	27.7417	25.7301	29.0665	0.84476	28.1331	13.1783
29.3512	0.33659	27.4883	0.71021	28.2415	31.4645	29.6446	0.96509	28.6773	17.793
29.9375	0.39963	27.9504	0.88399	28.7413	37.8073	30.2228	1.09954	29.2215	23.5772
30.5239	0.47274	28.4125	1.09825	29.2411	44.5776	30.8009	1.24872	29.7658	30.5357
31.1102	0.55973	28.8746	1.3617	29.741	51.5412	31.3791	1.41509	30.31	38.5073
31.6966	0.66184	29.3367	1.68705	30.2408	58.4363	31.9572	1.59988	30.8542	47.145
32.2829	0.78034	29.7989	2.08619	30.7406	65.01	32.5354	1.80555	31.3985	55.9531
32.8693	0.91902	30.261	2.5766	31.2404	71.0564	33.1135	2.03454	31.9427	64.4014
33.4556	1.0829	30.7231	3.1773	31.7402	76.4321	33.6917	2.28809	32.4869	72.0369
34.042	1.27326	31.1852	3.91052	32.24	81.0714	34.2698	2.57049	33.0312	78.5786
34.6283	1.49639	31.6473	4.80404	32.7398	84.9775	34.8479	2.88359	33.5754	83.932
35.2147	1.75735	32.1095	5.88721	33.2397	88.1942	35.4261	3.23046	34.1197	88.1491
35.801	2.06117	32.5716	7.19574	33.7395	90.7962	36.0042	3.61478	34.6639	91.3718
36.3874	2.41667	33.0337	8.76693	34.2393	92.871	36.5824	4.04084	35.2081	93.7818
36.9738	2.8289	33.4958	10.6397	34.7391	94.5058	37.1605	4.51172	35.7523	95.551
37.5601	3.31047	33.9579	12.856	35.239	95.7819	37.7387	5.03232	36.2966	96.8325
38.1465	3.86894	34.42	15.4524	35.7388	96.774	38.3168	5.60695	36.8408	97.7542
38.7328	4.51692	34.8822	18.4615	36.2386	97.5384	38.895	6.23991	37.3851	98.4123
39.3192	5.26575	35.3443	21.9046	36.7384	98.1249	39.4731	6.93732	37.9293	98.8795
39.9055	6.13055	35.8064	25.785	37.2382	98.5711	40.0513	7.7035	38.4735	99.2109
40.4919	7.12521	36.2685	30.0883	37.738	98.9143	40.6294	8.54396	39.0178	99.4445
41.0782	8.26736	36.7306	34.7717	38.2379	99.1763	41.2075	9.46546	39.562	99.6102
41.6646	9.5734	37.1927	39.7694	38.7377	99.376	41.7857	10.4717	40.1063	99.7254
42.2509	11.0597	37.6549	44.99	39.2375	99.5258	42.3638	11.57	40.6505	99.8075
42.8373	12.7439	38.117	50.3226	39.7373	99.6412	42.942	12.7647	41.1947	99.8643
43.4236	14.6412	38.5791	55.6472	40.2371	99.7286	43.5201	14.0613	41.739	99.9053
44.01	16.7654	39.0412	60.8456	40.737	99.7941	44.0983	15.4647	42.2832	99.9337
44.5964	19.1291	39.5033	65.8083	41.2368	99.844	44.6764	16.9793	42.8274	99.9527
45.1827	21.7387	39.9654	70.4473	41.7366	99.8814	45.2546	18.6074	43.3717	99.9669
45.7691	24.5953	40.4276	74.699	42.2364	99.9126	45.8327	20.3522	43.9159	99.9779
46.3554	27.6953	40.8897	78.5263	42.7362	99.9345	46.4109	22.2148	44.4601	99.9842
46.9418	31.0234	41.3518	81.9138	43.236	99.9501	46.989	24.1947	45.0044	99.989
47.5281	34.5608	41.8139	84.8697	43.7358	99.9626	47.5671	26.2912	45.5486	99.9921
48.1145	38.2772	42.276	87.4178	44.2357	99.9719	48.1453	28.5001	46.0928	99.9953
48.7008	42.136	42.7381	89.5881	44.7355	99.9782	48.7234	30.8165	46.6371	99.9968
49.2872	46.0932	43.2003	91.4219	45.2353	99.9844	49.3016	33.2335	47.1813	99.9984
49.8735	50.0996	43.6624	92.9574	45.7351	99.9875	49.8797	35.7426	47.7255	99.9984
50.4599	54.1059	44.1245	94.2358	46.2349	99.9906	50.4579	38.3327	48.2698	99.9984
51.0462	58.0594	44.5866	95.2936	46.7348	99.9938	51.036	40.9916	48.814	100
51.6326	61.9119	45.0487	96.1657	47.2346	99.9969	51.6142	43.7052	49.3583	100
52.2189	65.6208	45.5108	96.8806	47.7344	99.9969	52.1923	46.458	49.9025	100
52.8053	69.1493	45.973	97.4663	48.2342	99.9969	52.7704	49.2347	50.4467	100
53.3916	72.4673	46.4351	97.9447	48.734	100	53.3486	52.0183	50.991	100
53.978	75.5559	46.8972	98.3336	49.2338	100	53.9267	54.7914	51.5352	100
54.5644	78.4012	47.3593	98.6502	49.7337	100	54.5049	57.538	52.0795	100
55.1507	80.9994	47.8214	98.9073	50.2335	100	55.083	60.2424	52.6237	100
55.7371	83.3531	48.2835	99.116	50.7333	100	55.6612	62.889	53.1679	100
56.3234	85.4672	48.7457	99.285	51.2331	100	56.2393	65.4644	53.7122	100
56.9098	87.3544	49.2078	99.4223	51.733	100	56.8175	67.9563	54.2564	100
57.4961	89.0285	49.6699	99.5326	52.2328	100	57.3956	70.3549	54.8006	100
58.0825	90.506	50.132	99.6223	52.7326	100	57.9738	72.651	55.3449	100
58.6688	91.8045	50.5941	99.6953	53.2324	100	58.5519	74.8384	55.8891	100
59.2552	92.9391	51.0562	99.754	53.7322	100	59.13	76.9128	56.4333	100
59.8415	93.9287	51.5184	99.8008	54.232	100	59.7082	78.87	56.9776	100
60.4279	94.7872	51.9805	99.8397	54.7319	100	60.2863	80.7099	57.5218	100
61.0142	95.5323	52.4426	99.8706	55.2317	100	60.8645	82.432	58.066	100
61.6006	96.1752	52.9047	99.8953	55.7315	100	61.4426	84.038	58.6103	100
62.187	96.7299	53.3668	99.9159	56.2313	100	62.0208	85.5305	59.1545	100
62.7733	97.2077	53.8289	99.9318	56.7311	100	62.5989	86.913	59.6987	100
63.3597	97.6174	54.2911	99.9453	57.2309	100	63.1771	88.19	60.243	100
63.946	97.9703	54.7532	99.9556	57.7308	100	63.7552	89.3656	60.7872	100
64.5324	98.2716	55.2153	99.9643	58.2306	100	64.3333	90.4455	61.3315	100
65.1187	98.5313	55.6774	99.9714	58.7304	100	64.9115	91.4358	61.8757	100
65.7051	98.7519	56.1395	99.977	59.2302	100	65.4896	92.3407	62.4199	100
66.2914	98.9423	56.6017	99.9818	59.73	100	66.0678	93.1664	62.9642	100
66.8778	99.1037	57.0638	99.9849	60.2298	100	66.6459	93.9191	63.5084	100
67.4641	99.2424	57.5259	99.9881	60.7297	100	67.2241	94.6036	64.0526	100
68.0505	99.3608	57.988	99.9905	61.2295	100	67.8022	95.2249	64.5969	100
68.6368	99.4617	58.4501	99.9921	61.7293	100	68.3804	95.7885	65.1411	100
69.2232	99.5474	58.9122	99.9937	62.2291	100	68.9585	96.2993	65.6853	100
69.8096	99.6205	59.3744	99.9952	62.7289	100	69.5367	96.7616	66.2296	100
70.3959	99.6836	59.8365	99.996	63.2288	100	70.1148	97.179	66.7738	100
70.9823	99.7365	60.2986	99.9968	63.7286	100	70.6929	97.556	67.3181	100
71.5686	99.7819	60.7607	99.9976	64.2284	100	71.2711	97.8961	67.8623	100
72.155	99.821	61.2228	99.9984	64.7282	100	71.8492	98.2031	68.4065	100
72.7413	99.8538	61.685	99.9984	65.228	100	72.4274	98.4793	68.9508	100
73.3277	99.8828	62.1471	99.9992	65.7279	100	73.0055	98.7286	69.495	100
73.914	99.9067	62.6092	99.9992	66.2277	100	73.5837	98.9527	70.0392	100
74.5004	99.9269	63.0713	99.9992	66.7275	100	74.1618	99.154	70.5835	100
75.0867	99.9445	63.5334	99.9992	67.2273	100	74.74	99.3351	71.1277	100
75.6731	99.9584	63.9955	100	67.7271	100	75.3181	99.4978	71.6719	100
76.2594	99.9723	64.4577	100	68.227	100	75.8963	99.6445	72.2162	100
76.8458	99.9823	64.9198	100	68.7268	100	76.4744	99.7759	72.7604	100
77.4321	99.9912	65.3819	100	69.2266	100	77.0525	99.8938	73.3047	100
78.0185	100	65.844	100	69.7264	100	77.6307	100	73.8489	100

## Sheet: Figure 4J
Hev-2		Y2A		N6A
19.9695	0	19.8195	0	19.8195	0
20.6009	0.00117	20.4524	1.27029	20.4461	0.00958
21.2323	0.0035	21.0853	2.76488	21.0726	0.02311
21.8637	0.007	21.7183	4.51101	21.6992	0.04227
22.4951	0.01166	22.3512	6.54013	22.3257	0.06763
23.1265	0.01807	22.9841	8.88158	22.9523	0.10257
23.758	0.02798	23.617	11.5605	23.5788	0.15048
24.3894	0.04197	24.25	14.5958	24.2054	0.21642
25.0208	0.06237	24.8829	17.999	24.8319	0.30603
25.6522	0.0921	25.5158	21.7679	25.4585	0.42889
26.2836	0.13465	26.1487	25.8859	26.0851	0.59684
26.915	0.19644	26.7817	30.3204	26.7116	0.82622
27.5464	0.28621	27.4146	35.0201	27.3382	1.13845
28.1778	0.41504	28.0475	39.9199	27.9647	1.56283
28.8092	0.60099	28.6804	44.9403	28.5913	2.13937
29.4406	0.86913	29.3133	49.9911	29.2178	2.91769
30.072	1.25503	29.9463	54.9842	29.8444	3.96483
30.7034	1.80764	30.5792	59.8338	30.471	5.36309
31.3348	2.59633	31.2121	64.4611	31.0975	7.21504
31.9662	3.71553	31.845	68.8065	31.7241	9.63733
32.5977	5.29117	32.478	72.8239	32.3506	12.7585
33.2291	7.48178	33.1109	76.4849	32.9772	16.7013
33.8605	10.478	33.7438	79.7791	33.6037	21.5589
34.4919	14.4867	34.3767	82.7074	34.2303	27.3633
35.1233	19.6905	35.0097	85.2837	34.8569	34.0502
35.7547	26.1912	35.6426	87.5308	35.4834	41.4383
36.3861	33.9306	36.2755	89.4729	36.11	49.2315
37.0175	42.636	36.9084	91.1415	36.7365	57.0615
37.6489	51.8228	37.5414	92.5658	37.3631	64.5526
38.2803	60.8878	38.1743	93.7764	37.9896	71.3918
38.9117	69.2585	38.8072	94.7993	38.6162	77.3743
39.5431	76.5287	39.4401	95.6619	39.2428	82.4133
40.1746	82.5135	40.073	96.3872	39.8693	86.5252
40.806	87.2271	40.706	96.9941	40.4959	89.7951
41.4374	90.8114	41.3389	97.5013	41.1224	92.3414
42.0688	93.4655	41.9718	97.9248	41.749	94.2931
42.7002	95.3914	42.6047	98.278	42.3755	95.7703
43.3316	96.77	43.2377	98.5714	43.0021	96.8772
43.963	97.7453	43.8706	98.8157	43.6287	97.7017
44.5944	98.4314	44.5035	99.019	44.2552	98.3121
45.2258	98.9105	45.1364	99.1867	44.8818	98.7629
45.8572	99.2451	45.7694	99.3271	45.5083	99.0938
46.4886	99.4771	46.4023	99.4424	46.1349	99.3372
47.12	99.638	47.0352	99.5388	46.7614	99.5153
47.7515	99.7499	47.6681	99.6185	47.388	99.6461
48.3829	99.8269	48.301	99.6845	48.0145	99.7413
49.0143	99.8805	48.934	99.739	48.6411	99.8112
49.6457	99.9172	49.5669	99.7841	49.2677	99.8619
50.2771	99.9429	50.1998	99.8208	49.8942	99.8991
50.9085	99.9604	50.8327	99.8522	50.5208	99.9262
51.5399	99.9726	51.4657	99.8774	51.1473	99.9465
52.1713	99.9814	52.0986	99.8983	51.7739	99.9605
52.8027	99.9872	52.7315	99.9162	52.4004	99.9713
53.4341	99.9913	53.3644	99.9308	53.027	99.9792
54.0655	99.9942	53.9973	99.9424	53.6536	99.9848
54.6969	99.9959	54.6303	99.9528	54.2801	99.9887
55.3284	99.9971	55.2632	99.9612	54.9067	99.9916
55.9598	99.9982	55.8961	99.9675	55.5332	99.9938
56.5912	99.9988	56.529	99.9738	56.1598	99.9955
57.2226	99.9994	57.162	99.978	56.7863	99.9966
57.854	99.9994	57.7949	99.9822	57.4129	99.9977
58.4854	99.9994	58.4278	99.9853	58.0395	99.9983
59.1168	100	59.0607	99.9874	58.666	99.9989
59.7482	100	59.6937	99.9895	59.2926	99.9989
60.3796	100	60.3266	99.9916	59.9191	99.9994
61.011	100	60.9595	99.9927	60.5457	99.9994
61.6424	100	61.5924	99.9948	61.1722	99.9994
62.2738	100	62.2254	99.9958	61.7988	99.9994
62.9053	100	62.8583	99.9958	62.4254	100
63.5367	100	63.4912	99.9969	63.0519	100
64.1681	100	64.1241	99.9979	63.6785	100
64.7995	100	64.7571	99.9979	64.305	100
65.4309	100	65.39	99.9979	64.9316	100
66.0623	100	66.0229	99.9989	65.5581	100
66.6937	100	66.6558	99.9989	66.1847	100
67.3251	100	67.2887	99.9989	66.8112	100
67.9565	100	67.9217	99.9989	67.4378	100
68.5879	100	68.5546	100	68.0644	100
69.2193	100	69.1875	100	68.6909	100
69.8507	100	69.8204	100	69.3175	100
70.4822	100	70.4534	100	69.944	100
71.1136	100	71.0863	100	70.5706	100
71.745	100	71.7192	100	71.1971	100
72.3764	100	72.3521	100	71.8237	100
73.0078	100	72.9851	100	72.4502	100
73.6392	100	73.618	100	73.0768	100
74.2706	100	74.2509	100	73.7034	100
74.902	100	74.8838	100	74.3299	100
75.5334	100	75.5167	100	74.9565	100
76.1648	100	76.1497	100	75.583	100
76.7962	100	76.7826	100	76.2096	100
77.4276	100	77.4155	100	76.8362	100
78.059	100	78.0484	100	77.4627	100
78.6904	100	78.6814	100	78.0893	100
79.3219	100	79.3143	100	78.7158	100
79.9533	100	79.9472	100	79.3424	100
80.5847	100	80.5801	100	79.9689	100
81.2161	100	81.213	100	80.5955	100
81.8475	100	81.846	100	81.222	100
82.4789	100	82.4789	100	81.8486	100

## Sheet: Figure 5I
WT		3aa
20.1194	0	19.7445	0
20.7397	0.01957	20.3843	0.000848594
21.3601	0.04214	21.0241	0.000848594
21.9804	0.06773	21.6639	0.000848594
22.6008	0.09733	22.3037	0.0017
23.2211	0.13144	22.9435	0.0017
23.8415	0.17008	23.5833	0.00255
24.4618	0.21473	24.2231	0.00424
25.0821	0.2659	24.8629	0.00594
25.7025	0.3246	25.5027	0.00933
26.3228	0.39132	26.1425	0.01443
26.9432	0.46859	26.7823	0.02206
27.5635	0.55689	27.4221	0.03394
28.1839	0.65773	28.0619	0.05261
28.8042	0.77362	28.7018	0.08147
29.4245	0.90607	29.3416	0.12559
30.0449	1.05758	29.9814	0.19433
30.6652	1.23117	30.6212	0.3004
31.2856	1.42984	31.261	0.46333
31.9059	1.65661	31.9008	0.71452
32.5263	1.91548	32.5406	1.10063
33.1466	2.21149	33.1804	1.69125
33.767	2.54863	33.8202	2.59245
34.3873	2.93243	34.46	3.95275
35.0076	3.36991	35.0998	5.98344
35.628	3.86709	35.7396	8.9603
36.2483	4.431	36.3794	13.2109
36.8687	5.07066	37.0192	19.0543
37.489	5.79461	37.659	26.6891
38.1094	6.61138	38.2988	36.0211
38.7297	7.532	38.9386	46.5445
39.3501	8.567	39.5784	57.3845
39.9704	9.72642	40.2182	67.5591
40.5907	11.0213	40.858	76.3073
41.2111	12.4627	41.4978	83.2793
41.8314	14.0611	42.1376	88.5092
42.4518	15.8251	42.7775	92.2557
43.0721	17.7626	43.4173	94.8516
43.6925	19.8798	44.057	96.609
44.3128	22.1791	44.6969	97.7809
44.9331	24.6615	45.3367	98.5532
45.5535	27.3225	45.9765	99.0598
46.1738	30.1541	46.6163	99.3899
46.7942	33.1447	47.2561	99.6046
47.4145	36.2768	47.8959	99.7437
48.0348	39.5288	48.5357	99.8345
48.6552	42.8756	49.1755	99.8922
49.2755	46.2887	49.8153	99.9304
49.8959	49.7359	50.4551	99.955
50.5162	53.186	51.0949	99.9711
51.1366	56.6056	51.7347	99.9813
51.7569	59.9635	52.3745	99.9873
52.3773	63.2305	53.0143	99.9915
52.9976	66.3807	53.6541	99.9949
53.618	69.3919	54.2939	99.9966
54.2383	72.2471	54.9337	99.9975
54.8586	74.9326	55.5735	99.9983
55.479	77.4401	56.2133	99.9992
56.0993	79.7655	56.8531	99.9992
56.7197	81.9083	57.4929	99.9992
57.34	83.8704	58.1327	99.9992
57.9603	85.6585	58.7726	100
58.5807	87.2794	59.4124	100
59.201	88.7424	60.0521	100
59.8214	90.0573	60.692	100
60.4417	91.2353	61.3318	100
61.0621	92.2869	61.9716	100
61.6824	93.2226	62.6114	100
62.3028	94.0539	63.2512	100
62.9231	94.7899	63.891	100
63.5434	95.4406	64.5308	100
64.1638	96.015	65.1706	100
64.7841	96.5212	65.8104	100
65.4045	96.9662	66.4502	100
66.0248	97.3576	67.09	100
66.6452	97.7012	67.7298	100
67.2655	98.0022	68.3696	100
67.8858	98.2661	69.0094	100
68.5062	98.4974	69.6492	100
69.1265	98.6996	70.289	100
69.7469	98.8762	70.9288	100
70.3672	99.0307	71.5686	100
70.9876	99.1662	72.2084	100
71.6079	99.2841	72.8482	100
72.2283	99.3869	73.488	100
72.8486	99.4767	74.1278	100
73.4689	99.5555	74.7677	100
74.0893	99.6237	75.4074	100
74.7096	99.6834	76.0473	100
75.33	99.7356	76.6871	100
75.9503	99.7813	77.3269	100
76.5707	99.8209	77.9667	100
77.191	99.855	78.6065	100
77.8113	99.8851	79.2463	100
78.4317	99.9117	79.8861	100
79.052	99.9343	80.5259	100
79.6724	99.9544	81.1657	100
80.2927	99.9719	81.8055	100
80.9131	99.987	82.4453	100
81.5334	100	83.0851	100

## Sheet: Figure 5L
GL9-A2		DL9-A2		DL9-A2M
20.0694	0	19.8195	0	19.9695	0
20.664	0.00395	20.4064	0.01351	20.5588	0.000607168
21.2587	0.0089	20.9933	0.03217	21.1481	0.00121
21.8533	0.01434	21.5802	0.05533	21.7374	0.00182
22.448	0.02027	22.1671	0.08622	22.3267	0.00304
23.0426	0.02719	22.7539	0.12611	22.916	0.00486
23.6373	0.0351	23.3408	0.17758	23.5053	0.00668
24.232	0.044	23.9277	0.24449	24.0945	0.00971
24.8266	0.05438	24.5146	0.332	24.6838	0.01396
25.4213	0.06624	25.1015	0.44459	25.2731	0.02064
26.0159	0.07959	25.6884	0.59129	25.8624	0.02914
26.6105	0.09491	26.2753	0.78109	26.4517	0.04129
27.2052	0.11221	26.8622	1.02623	27.041	0.05829
27.7998	0.13199	27.4491	1.34342	27.6303	0.08257
28.3945	0.15472	28.036	1.75198	28.2196	0.11658
28.9891	0.18043	28.6228	2.27893	28.8089	0.16515
29.5838	0.21009	29.2097	2.9545	29.3982	0.23255
30.1784	0.24321	29.7966	3.81859	29.9875	0.32848
30.7731	0.28177	30.3835	4.91945	30.5768	0.46266
31.3677	0.32527	30.9704	6.31241	31.166	0.65149
31.9624	0.3747	31.5573	8.0631	31.7553	0.91622
32.557	0.43105	32.1442	10.243	32.3446	1.2878
33.1517	0.49532	32.7311	12.9253	32.9339	1.80693
33.7463	0.56848	33.318	16.1809	33.5232	2.53007
34.341	0.65152	33.9049	20.0651	34.1125	3.5325
34.9356	0.74643	34.4918	24.6056	34.7018	4.91078
35.5303	0.8542	35.0786	29.7882	35.2911	6.78936
36.1249	0.97679	35.6655	35.546	35.8804	9.31639
36.7196	1.11619	36.2524	41.7535	36.4697	12.6558
37.3142	1.27487	36.8393	48.2332	37.059	16.9679
37.9089	1.4553	37.4262	54.7715	37.6483	22.3735
38.5035	1.65995	38.0131	61.1482	38.2375	28.9012
39.0982	1.89229	38.6	67.1647	38.8268	36.4398
39.6928	2.15626	39.1869	72.6657	39.4161	44.7076
40.2875	2.45483	39.7738	77.553	40.0054	53.2796
40.8821	2.79394	40.3606	81.7853	40.5947	61.6616
41.4768	3.17704	40.9475	85.3697	41.184	69.4036
42.0714	3.61057	41.5344	88.3493	41.7733	76.1863
42.6661	4.09995	42.1213	90.7878	42.3626	81.8578
43.2607	4.65212	42.7082	92.7572	42.9519	86.4195
43.8554	5.27398	43.2951	94.3323	43.5412	89.975
44.45	5.97345	43.882	95.5811	44.1305	92.6782
45.0447	6.75894	44.4689	96.5649	44.7198	94.6952
45.6393	7.63835	45.0558	97.3357	45.309	96.1797
46.234	8.62157	45.6427	97.9373	45.8983	97.2611
46.8286	9.71749	46.2296	98.405	46.4876	98.0419
47.4233	10.9355	46.8164	98.7679	47.0769	98.6035
48.0179	12.2855	47.4033	99.049	47.6662	99.0061
48.6126	13.7759	47.9902	99.2665	48.2555	99.2933
49.2072	15.4151	48.5771	99.4351	48.8448	99.4979
49.8019	17.211	49.164	99.5644	49.4341	99.643
50.3965	19.1681	49.7509	99.6648	50.0234	99.7468
50.9912	21.2907	50.3378	99.7413	50.6127	99.8203
51.5858	23.5804	50.9247	99.8012	51.202	99.8725
52.1805	26.0357	51.5115	99.8469	51.7913	99.9095
52.7751	28.6507	52.0984	99.8823	52.3806	99.9356
53.3698	31.4185	52.6853	99.9093	52.9699	99.9545
53.9644	34.3256	53.2722	99.9299	53.5591	99.9678
54.5591	37.3563	53.8591	99.9459	54.1484	99.9769
55.1537	40.4919	54.446	99.9582	54.7377	99.9836
55.7484	43.7089	55.0329	99.9678	55.327	99.9885
56.343	46.9824	55.6198	99.9755	55.9163	99.9915
56.9377	50.285	56.2067	99.9807	56.5056	99.9939
57.5323	53.5881	56.7936	99.9852	57.0949	99.9958
58.127	56.8635	57.3805	99.9884	57.6842	99.997
58.7216	60.0845	57.9673	99.991	58.2735	99.9976
59.3163	63.225	58.5542	99.9929	58.8628	99.9982
59.9109	66.2626	59.1411	99.9948	59.4521	99.9988
60.5056	69.1772	59.728	99.9961	60.0414	99.9988
61.1002	71.9523	60.3149	99.9968	60.6306	99.9994
61.6949	74.5762	60.9018	99.9974	61.2199	99.9994
62.2895	77.0405	61.4887	99.9981	61.8092	99.9994
62.8842	79.3391	62.0756	99.9987	62.3985	99.9994
63.4788	81.4711	62.6625	99.9987	62.9878	99.9994
64.0735	83.4376	63.2493	99.9987	63.5771	99.9994
64.6681	85.2418	63.8362	99.9994	64.1664	100
65.2628	86.8894	64.4231	99.9994	64.7557	100
65.8574	88.3882	65.01	99.9994	65.345	100
66.4521	89.7457	65.5969	99.9994	65.9343	100
67.0467	90.9706	66.1838	99.9994	66.5236	100
67.6414	92.073	66.7707	99.9994	67.1128	100
68.236	93.0621	67.3576	100	67.7022	100
68.8307	93.947	67.9445	100	68.2914	100
69.4253	94.7374	68.5314	100	68.8807	100
70.02	95.4413	69.1183	100	69.47	100
70.6146	96.0671	69.7051	100	70.0593	100
71.2093	96.6232	70.292	100	70.6486	100
71.8039	97.1161	70.8789	100	71.2379	100
72.3986	97.5526	71.4658	100	71.8272	100
72.9932	97.9382	72.0527	100	72.4165	100
73.5879	98.2793	72.6396	100	73.0058	100
74.1825	98.5803	73.2265	100	73.5951	100
74.7772	98.8457	73.8134	100	74.1844	100
75.3718	99.0801	74.4003	100	74.7737	100
75.9664	99.2862	74.9871	100	75.3629	100
76.5611	99.4676	75.574	100	75.9522	100
77.1557	99.6273	76.1609	100	76.5415	100
77.7504	99.7677	76.7478	100	77.1308	100
78.3451	99.8912	77.3347	100	77.7201	100
78.9397	100	77.9216	100	78.3094	100
--	--

## Sheet: Figure 6G
GL9		GP9
19.9695	0	20.1694	0
20.5448	0.01359	20.7594	0.01058
21.1202	0.02861	21.3493	0.02502
21.6955	0.04542	21.9393	0.0433
22.2708	0.06402	22.5293	0.06688
22.8462	0.08476	23.1192	0.09767
23.4215	0.10801	23.7092	0.13712
23.9968	0.13376	24.2992	0.1886
24.5722	0.16238	24.8891	0.25499
25.1475	0.19421	25.4791	0.34111
25.7229	0.22962	26.0691	0.45273
26.2982	0.26896	26.659	0.59659
26.8735	0.31295	27.249	0.7823
27.4489	0.36195	27.839	1.02238
28.0242	0.41667	28.4289	1.33126
28.5995	0.47712	29.0189	1.72915
29.1749	0.54435	29.6089	2.2401
29.7502	0.61946	30.1988	2.89394
30.3255	0.7028	30.7888	3.72821
30.9009	0.79543	31.3788	4.78908
31.4762	0.89879	31.9687	6.129
32.0515	1.01324	32.5587	7.81003
32.6269	1.14057	33.1486	9.90147
33.2022	1.28184	33.7386	12.4745
33.7775	1.43921	34.3286	15.5984
34.3529	1.61339	34.9185	19.329
34.9282	1.80689	35.5085	23.7
35.5035	2.02184	36.0985	28.7056
36.0789	2.25968	36.6884	34.2924
36.6542	2.52363	37.2784	40.3492
37.2296	2.81584	37.8684	46.7149
37.8049	3.13952	38.4583	53.1884
38.3802	3.49753	39.0483	59.556
38.9556	3.8931	39.6383	65.6172
39.5309	4.33016	40.2282	71.2083
40.1062	4.81228	40.8182	76.2196
40.6816	5.34376	41.4082	80.5964
41.2569	5.92925	41.9981	84.3333
41.8322	6.57267	42.5881	87.4625
42.4076	7.27976	43.1781	90.0403
42.9829	8.05481	43.768	92.1356
43.5583	8.90353	44.358	93.8205
44.1336	9.83094	44.948	95.1633
44.7089	10.8424	45.5379	96.2261
45.2843	11.9433	46.1279	97.0623
45.8596	13.1386	46.7178	97.718
46.4349	14.4333	47.3078	98.23
47.0103	15.8317	47.8978	98.6283
47.5856	17.3378	48.4877	98.9382
48.1609	18.9544	49.0777	99.1787
48.7363	20.6841	49.6677	99.3649
49.3116	22.5278	50.2576	99.5093
49.8869	24.4856	50.8476	99.6209
50.4623	26.5557	51.4376	99.707
51.0376	28.7349	52.0275	99.7739
51.6129	31.0189	52.6175	99.8254
52.1883	33.4013	53.2075	99.8653
52.7636	35.8731	53.7974	99.8961
53.3389	38.425	54.3874	99.9197
53.9143	41.0448	54.9774	99.9379
54.4896	43.7201	55.5673	99.9524
55.065	46.4361	56.1573	99.963
55.6403	49.1786	56.7473	99.9716
56.2156	51.9308	57.3372	99.9779
56.791	54.6773	57.9272	99.9832
57.3663	57.4023	58.5172	99.987
57.9416	60.0904	59.1071	99.9899
58.517	62.7267	59.6971	99.9923
59.0923	65.2983	60.2871	99.9938
59.6676	67.7933	60.877	99.9952
60.243	70.2007	61.467	99.9962
60.8183	72.5126	62.057	99.9971
61.3937	74.7211	62.6469	99.9976
61.969	76.8216	63.2369	99.9981
62.5443	78.8102	63.8269	99.9986
63.1197	80.6854	64.4168	99.999
63.695	82.4465	65.0068	99.999
64.2703	84.0939	65.5968	99.9995
64.8457	85.63	66.1867	99.9995
65.421	87.0574	66.7767	99.9995
65.9963	88.3804	67.3667	99.9995
66.5717	89.6025	67.9566	99.9995
67.147	90.7288	68.5466	100
67.7223	91.7642	69.1365	100
68.2977	92.7142	69.7265	100
68.873	93.584	70.3165	100
69.4483	94.3787	70.9065	100
70.0237	95.1037	71.4964	100
70.599	95.7643	72.0864	100
71.1744	96.3651	72.6763	100
71.7497	96.9109	73.2663	100
72.325	97.4063	73.8563	100
72.9004	97.8551	74.4462	100
73.4757	98.2618	75.0362	100
74.051	98.6298	75.6262	100
74.6264	98.9624	76.2161	100
75.2017	99.2629	76.8061	100
75.777	99.5343	77.3961	100
76.3524	99.7793	77.986	100
76.9277	100	78.576	100
